# Supplementary material for: Estimate of lysine nutritional requirements for Japanese quail breeders
Source: PeerJ. 2023 Nov 6;11:e15637. doi: 10.7717/peerj.15637 (PMC10634330; doi:10.7717/peerj.15637)
Supplement: Supplemental Information 1 [file peerj-11-15637-s001.xlsx]

## Sheet: Planilha1
Obs	Treatment	Level of Lys	Crude protein in the diet	Lys in the diet	Feed Intake	Number of eggs	Egg production	Egg weight	Initial BW	Final BW
		%	g/kg	g/kg	g		%	g	g	g
1	1	7.07	0.33	0.298	14.25	4.00	25.00	8.51	131.12	120.16
2	1	7.07	0.33	0.298	15.56	3.00	18.75	8.41	146.05	148.69
4	1	7.07	0.33	0.298	14.64	3.00	18.75	8.06	129.08	123.27
5	1	7.07	0.33	0.298	15.44	5.00	31.25	8.51	149.46	134.11
7	1	7.07	0.33	0.298	16.00	4.00	25.00	8.71	141.43	140.95
9	2	10.61	0.49	0.447	17.89	8.00	50.00	8.21	165.79	147.85
10	2	10.61	0.49	0.447	15.69	8.00	50.00	7.90	133.82	124.52
11	2	10.61	0.49	0.447	16.17	7.00	43.75	9.22	152.67	149.97
12	2	10.61	0.49	0.447	20.92	8.00	50.00	8.61	140.61	154.90
13	2	10.61	0.49	0.447	21.96	7.00	43.75	9.04	147.78	150.60
14	2	10.61	0.49	0.447	19.29	6.00	37.50	8.45	144.83	122.07
15	3	14.14	0.66	0.596	22.64	15.00	93.75	10.02	151.93	147.11
16	3	14.14	0.66	0.596	22.01	14.00	87.50	9.64	168.75	167.24
17	3	14.14	0.66	0.596	22.72	10.00	62.50	9.82	155.92	151.38
18	3	14.14	0.66	0.596	23.59	11.00	68.75	11.16	160.61	173.05
20	3	14.14	0.66	0.596	23.65	9.00	56.25	9.02	161.45	152.08
22	4	17.68	0.82	0.745	25.16	15.00	93.75	10.54	158.10	162.65
23	4	17.68	0.82	0.745	22.76	9.00	56.25	10.35	171.19	171.87
25	4	17.68	0.82	0.745	23.41	14.00	87.50	10.29	157.39	156.79
26	4	17.68	0.82	0.745	23.43	14.00	87.50	10.95	168.07	175.63
27	4	17.68	0.82	0.745	23.02	14.00	87.50	10.75	166.19	165.25
28	4	17.68	0.82	0.745	21.52	7.00	43.75	10.20	168.01	161.22
29	5	24.75	1.15	1043	25.07	12.00	75.00	10.60	170.33	158.22
30	5	24.75	1.15	1043	26.02	14.00	87.50	10.17	174.10	178.97
31	5	24.75	1.15	1043	25.67	15.00	93.75	10.84	157.11	155.47
33	5	24.75	1.15	1043	25.31	16.00	100.00	10.59	172.23	159.94
34	5	24.75	1.15	1043	24.06	16.00	100.00	10.99	160.00	158.56
35	5	24.75	1.15	1043	24.30	14.00	87.50	10.67	164.02	166.42
36	6	28.28	1.32	1192	25.57	15.00	93.75	10.84	164.34	159.65
37	6	28.28	1.32	1192	23.15	15.00	93.75	10.22	178.06	176.58
38	6	28.28	1.32	1192	23.12	13.00	81.25	10.35	166.23	154.79
40	6	28.28	1.32	1192	25.17	16.00	100.00	10.77	170.51	170.71
41	6	28.28	1.32	1192	24.99	12.00	75.00	10.67	178.45	193.59
42	6	28.28	1.32	1192	23.61	18.00	100.00	9.89	178.28	174.14
43	7	35.35	1.65	1489	22.41	10.00	62.50	11.55	158.87	159.10
44	7	35.35	1.65	1489	23.74	15.00	93.75	11.44	162.53	180.55
45	7	35.35	1.65	1489	24.27	14.00	87.50	10.39	174.69	178.18
46	7	35.35	1.65	1489	23.90	15.00	93.75	11.95	173.80	179.40
47	7	35.35	1.65	1489	24.63	12.00	75.00	11.62	162.90	177.07
48	7	35.35	1.65	1489	21.79	16.00	100.00	10.88	184.29	179.84
49	7	35.35	1.65	1489	23.85	13.00	81.25	10.64	165.50	179.56
